# Supplementary material
Source: publisher figshare collection journal article supplement (https://acs.figshare.com/ndownloader/files/4070725)

# checkCIF/PLATON report

Structure factors have been supplied for datablock(s) y

No syntax errors found.      CIF dictionary      Interpreting this report

## Datablock: y

---

Bond precision:    C-C = 0.0032 Å                      Wavelength=0.71073

Cell:                      a=17.0971(3)              b=17.0971(3)              c=13.6304(5)  
                            alpha=90                      beta=90                      gamma=120

Temperature:              293 K

|                | Calculated                                       | Reported           |
|----------------|--------------------------------------------------|--------------------|
| Volume         | 3450.5(2)                                        | 3450.51(15)        |
| Space group    | P -3                                             | P-3                |
| Hall group     | -P 3                                             | ?                  |
| Moiety formula | C24 H12 Cd2 N3 O15, C24<br>H12 Cd N3 O9, 0.99(O) | ?                  |
| Sum formula    | C48 H24 Cd3 N6 O25                               | C48 H24 Cd3 N6 O25 |
| Mr             | 1421.80                                          | 1421.93            |
| Dx,g cm-3      | 1.368                                            | 1.369              |
| Z              | 2                                                | 2                  |
| Mu (mm-1)      | 0.987                                            | 0.988              |
| F000           | 1395.8                                           | 1396.0             |
| F000'          | 1391.76                                          |                    |
| h,k,lmax       | 21,21,16                                         | 21,21,16           |
| Nref           | 4568                                             | 4566               |
| Tmin,Tmax      | 0.821,0.837                                      | 0.827,0.842        |
| Tmin'          | 0.821                                            |                    |

Correction method= MULTI-SCAN

Data completeness= 1.000                      Theta(max)= 26.060

R(reflections)= 0.0886( 4296)              wR2(reflections)= 0.2591( 4566)

S = 1.038                      Npar= 226

---

The following ALERTS were generated. Each ALERT has the format  
**test-name\_ALERT\_alert-type\_alert-level.**

Click on the hyperlinks for more details of the test.

---

### Alert level A

PLAT601\_ALERT\_2\_A Structure Contains Solvent Accessible VOIDS of .                      315 A\*\*3

---

### 🔴 Alert level B

|                   |                           |                                  |                   |       |     |         |
|-------------------|---------------------------|----------------------------------|-------------------|-------|-----|---------|
| PLAT220_ALERT_2_B | Large Non-Solvent         | O                                | Ueq(max)/Ueq(min) | ...   | 4.5 | Ratio   |
| PLAT230_ALERT_2_B | Hirshfeld Test Diff for   | O8                               | --                | C9    | ..  | 9.0 su  |
| PLAT230_ALERT_2_B | Hirshfeld Test Diff for   | O8                               | --                | C16   | ..  | 10.1 su |
| PLAT230_ALERT_2_B | Hirshfeld Test Diff for   | N2                               | --                | C16   | ..  | 9.7 su  |
| PLAT230_ALERT_2_B | Hirshfeld Test Diff for   | N2                               | --                | C16_f | ..  | 31.2 su |
| PLAT230_ALERT_2_B | Hirshfeld Test Diff for   | C7                               | --                | C8    | ..  | 11.0 su |
| PLAT230_ALERT_2_B | Hirshfeld Test Diff for   | C12                              | --                | C15   | ..  | 11.3 su |
| PLAT230_ALERT_2_B | Hirshfeld Test Diff for   | O7                               | --                | C3    | ..  | 9.5 su  |
| PLAT230_ALERT_2_B | Hirshfeld Test Diff for   | O7                               | --                | C14   | ..  | 15.1 su |
| PLAT232_ALERT_2_B | Hirshfeld Test Diff (M-X) | Cd2                              | --                | O4    | ..  | 30.0 su |
| PLAT232_ALERT_2_B | Hirshfeld Test Diff (M-X) | Cd3                              | --                | O5    | ..  | 29.5 su |
| PLAT232_ALERT_2_B | Hirshfeld Test Diff (M-X) | Cd3                              | --                | O6    | ..  | 28.8 su |
| PLAT241_ALERT_2_B | Check High                | Ueq as Compared to Neighbors for |                   |       |     | O4      |
| PLAT241_ALERT_2_B | Check High                | Ueq as Compared to Neighbors for |                   |       |     | O1      |
| PLAT242_ALERT_2_B | Check Low                 | Ueq as Compared to Neighbors for |                   |       |     | Cd2     |

---

### 🟡 Alert level C

RFACR01\_ALERT\_3\_C The value of the weighted R factor is > 0.25  
Weighted R factor given 0.259

SHFSU01\_ALERT\_2\_C The absolute value of parameter shift to su ratio > 0.05  
Absolute value of the parameter shift to su ratio given 0.065  
Additional refinement cycles may be required.

|                   |                                                  |           |
|-------------------|--------------------------------------------------|-----------|
| PLAT068_ALERT_1_C | Reported F000 Differs from Calcd (or Missing)... | ?         |
| PLAT080_ALERT_2_C | Maximum Shift/Error .....                        | 0.06      |
| PLAT084_ALERT_2_C | High wR2 Value .....                             | 0.26      |
| PLAT213_ALERT_2_C | Atom C16 has ADP max/min Ratio .....             | 4.0 prola |
| PLAT220_ALERT_2_C | Large Non-Solvent Cd Ueq(max)/Ueq(min) ...       | 3.3 Ratio |
| PLAT230_ALERT_2_C | Hirshfeld Test Diff for C7 -- C12 ..             | 6.0 su    |
| PLAT230_ALERT_2_C | Hirshfeld Test Diff for O2 -- C13 ..             | 6.3 su    |
| PLAT230_ALERT_2_C | Hirshfeld Test Diff for C3 -- C4 ..              | 7.0 su    |
| PLAT241_ALERT_2_C | Check High Ueq as Compared to Neighbors for      | C7        |
| PLAT241_ALERT_2_C | Check High Ueq as Compared to Neighbors for      | C15       |
| PLAT241_ALERT_2_C | Check High Ueq as Compared to Neighbors for      | O2        |
| PLAT242_ALERT_2_C | Check Low Ueq as Compared to Neighbors for       | C12       |
| PLAT242_ALERT_2_C | Check Low Ueq as Compared to Neighbors for       | Cd1       |
| PLAT242_ALERT_2_C | Check Low Ueq as Compared to Neighbors for       | C13       |
| PLAT910_ALERT_3_C | Missing # of FCF Reflections Below Th(Min) ..... | 2         |
| PLAT918_ALERT_3_C | Reflection(s) # with I(obs) much smaller I(calc) | 2         |

---

### 🟢 Alert level G

FORMU01\_ALERT\_2\_G There is a discrepancy between the atom counts in the  
\_chemical\_formula\_sum and the formula from the \_atom\_site\* data.  
Atom count from \_chemical\_formula\_sum: C48 H24 Cd3 N6 O25  
Atom count from the \_atom\_site data: C48 H24 Cd3 N6 O24.99

|                   |                                                  |           |
|-------------------|--------------------------------------------------|-----------|
| PLAT002_ALERT_2_G | Number of Distance or Angle Restraints on AtSite | 9         |
| PLAT003_ALERT_2_G | Number of Uiso or Uij Restrained Atom Sites .... | 12        |
| PLAT004_ALERT_5_G | Info: Polymeric Structure Found with Dimension . | 2         |
| PLAT004_ALERT_5_G | Info: Polymeric Structure Found with Dimension . | 2         |
| PLAT005_ALERT_5_G | No _iucr_refine_instructions_details in the CIF  | ?         |
| PLAT072_ALERT_2_G | SHELXL First Parameter in WGHT Unusually Large.  | 0.17      |
| PLAT083_ALERT_2_G | SHELXL Second Parameter in WGHT Unusually Large. | 8.63      |
| PLAT093_ALERT_1_G | No su's on H-positions, refinement reported as . | mixed     |
| PLAT152_ALERT_1_G | The Supplied and Calc. Volume s.l. Differ by ... | 5 Units   |
| PLAT199_ALERT_1_G | Check the Reported _cell_measurement_temperature | 293 K     |
| PLAT200_ALERT_1_G | Check the Reported _diffrn_ambient_temperature   | 293 K     |
| PLAT232_ALERT_2_G | Hirshfeld Test Diff (M-X) Cd1 -- O2 ..           | 6.0 su    |
| PLAT302_ALERT_4_G | Note: Anion/Solvent Disorder .....               | 100 Perc. |
| PLAT311_ALERT_2_G | Isolated Disordered Oxygen Atom (No H's ?) ..... | O1W       |

|                   |                                                  |      |       |
|-------------------|--------------------------------------------------|------|-------|
| PLAT764_ALERT_4_G | Overcomplete CIF Bond List Detected (Rep/Expd) . | 1.11 | Ratio |
| PLAT860_ALERT_3_G | Note: Number of Least-Squares Restraints .....   | 79   |       |
| PLAT870_ALERT_4_G | ALERTS Related to Twinning Effects Suppressed .. | !    |       |
| PLAT931_ALERT_5_G | Check Twin Law ( 0 0 1)[ ] Estimated BASF        | 0.50 |       |
| PLAT931_ALERT_5_G | Check Twin Law ( 1-1 0)[ ] Estimated BASF        | 0.50 |       |
| PLAT931_ALERT_5_G | Check Twin Law ( 1-2 0)[ ] Estimated BASF        | 0.50 |       |

---

1 **ALERT level A** = Most likely a serious problem - resolve or explain  
 15 **ALERT level B** = A potentially serious problem, consider carefully  
 18 **ALERT level C** = Check. Ensure it is not caused by an omission or oversight  
 21 **ALERT level G** = General information/check it is not something unexpected

5 ALERT type 1 CIF construction/syntax error, inconsistent or missing data  
 37 ALERT type 2 Indicator that the structure model may be wrong or deficient  
 4 ALERT type 3 Indicator that the structure quality may be low  
 3 ALERT type 4 Improvement, methodology, query or suggestion  
 6 ALERT type 5 Informative message, check

---

It is advisable to attempt to resolve as many as possible of the alerts in all categories. Often the minor alerts point to easily fixed oversights, errors and omissions in your CIF or refinement strategy, so attention to these fine details can be worthwhile. In order to resolve some of the more serious problems it may be necessary to carry out additional measurements or structure refinements. However, the purpose of your study may justify the reported deviations and the more serious of these should normally be commented upon in the discussion or experimental section of a paper or in the "special\_details" fields of the CIF. checkCIF was carefully designed to identify outliers and unusual parameters, but every test has its limitations and alerts that are not important in a particular case may appear. Conversely, the absence of alerts does not guarantee there are no aspects of the results needing attention. It is up to the individual to critically assess their own results and, if necessary, seek expert advice.

### Publication of your CIF in IUCr journals

A basic structural check has been run on your CIF. These basic checks will be run on all CIFs submitted for publication in IUCr journals (*Acta Crystallographica*, *Journal of Applied Crystallography*, *Journal of Synchrotron Radiation*); however, if you intend to submit to *Acta Crystallographica Section C* or *E*, you should make sure that full publication checks are run on the final version of your CIF prior to submission.

### Publication of your CIF in other journals

Please refer to the *Notes for Authors* of the relevant journal for any special instructions relating to CIF submission.

---

**PLATON version of 05/11/2012; check.def file version of 05/11/2012**

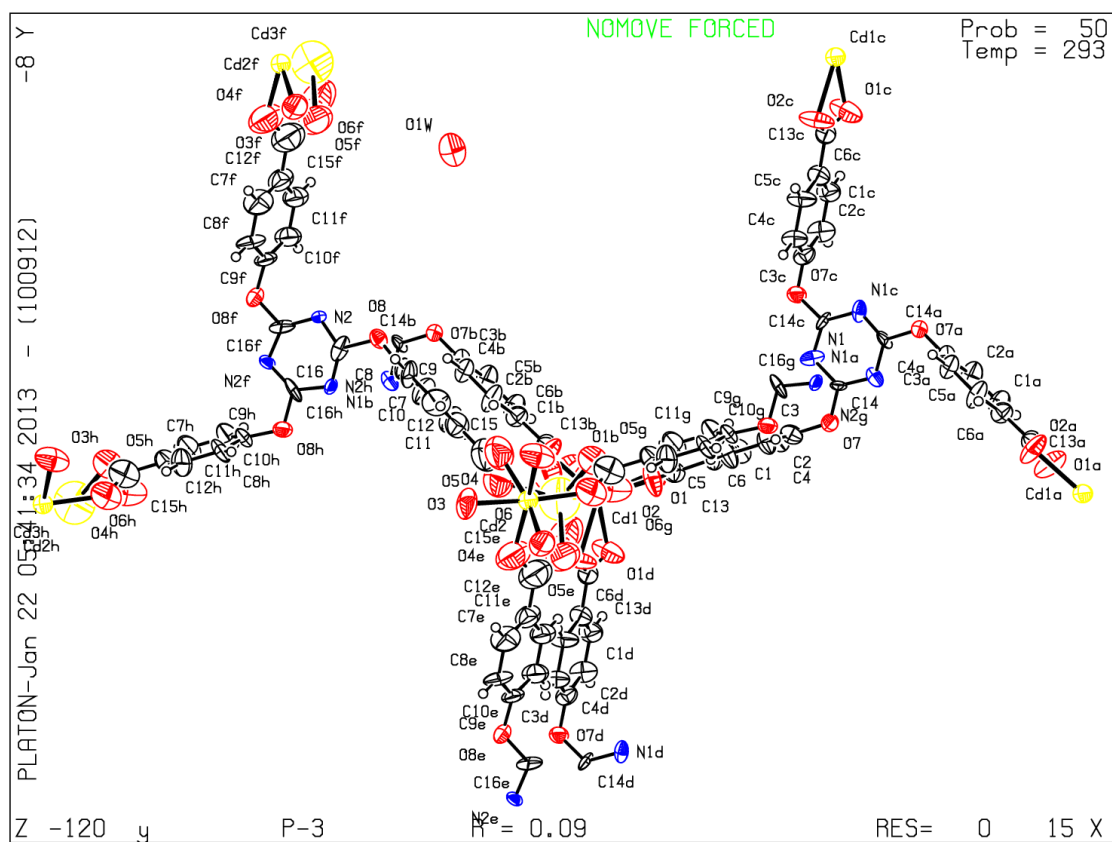

Supplement: Supplementary file 1 [file 4070725]
